# Supplementary material for: Polygenic Risk Score for Alzheimer’s Disease: Implications for Memory Performance and Hippocampal Volumes in Early Life
Source: Atypon-hosted journal article supplement (doi:10.1176/appi.ajp.2017.17050529), 2018-03-02
Supplement: appi.ajp.2017.17050529.ds001.pdf [file appi.ajp.2017.17050529.ds001.pdf]

 


Psychiatry Online
